# Supplementary material for: Combined Lycium barbarum Polysaccharides with Plasmon-Activated Water Affect IFN-γ/TNF-α Induced Inflammation in Caco-2 Cells
Source: MDPI journal article supplement (doi:10.3390/ph16101455), 2023-10-13
Supplement: s1 [file s1]

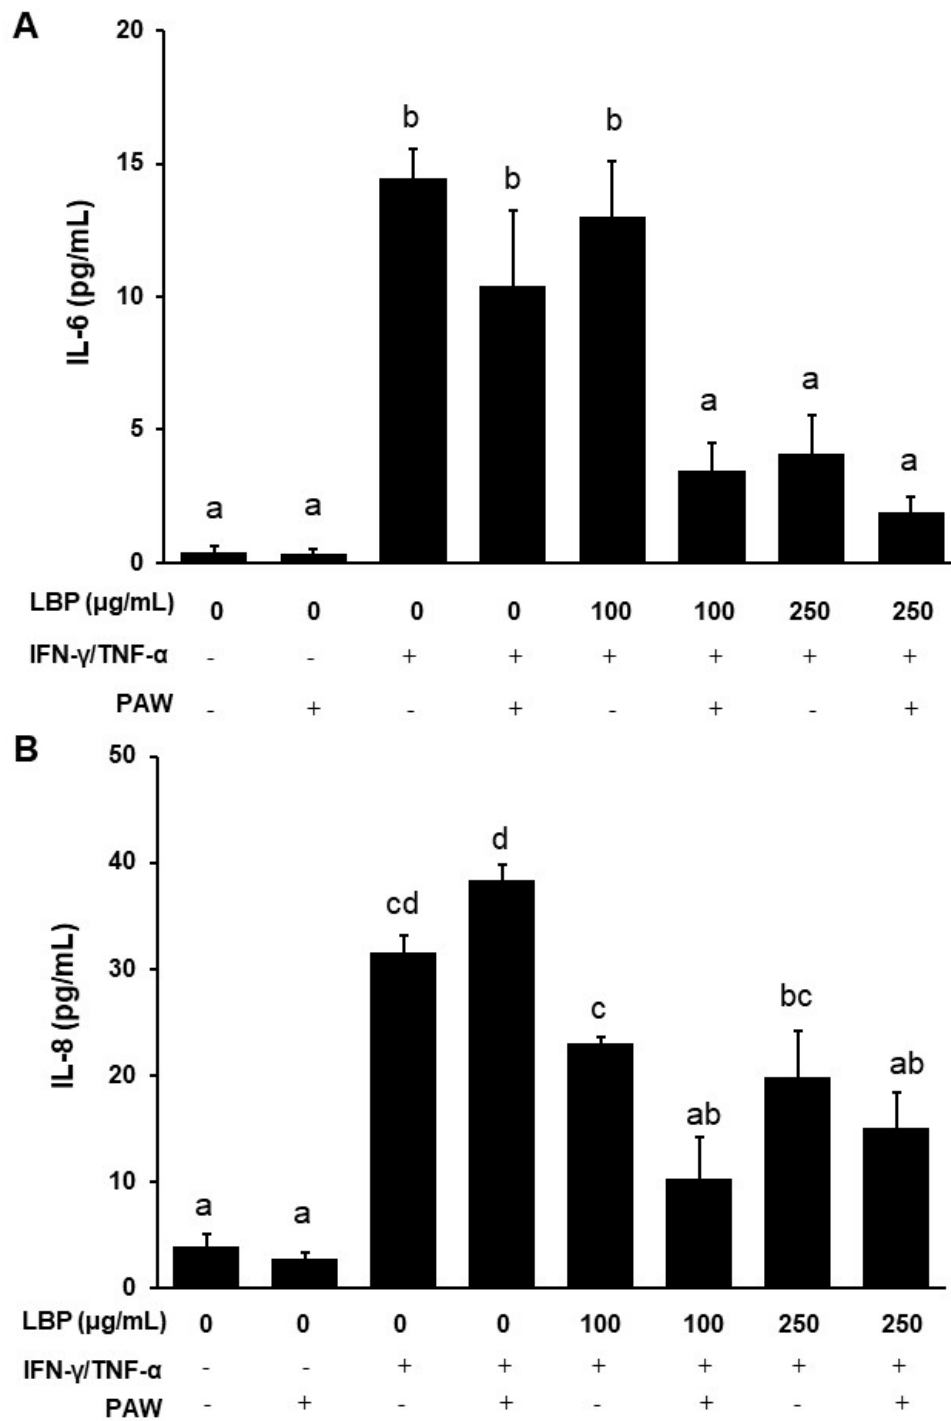

**Figure S1.** The levels of pro-inflammatory cytokines (A) IL-6 and (B) IL-8 in the medium of Caco-2 cells treated with *Lycium barbarum* polysaccharides (LBP, 100-250 µg/mL) with or without plasmon-activated water (PAW). Values are expressed as mean  $\pm$  SEM (n = 6 per group). The data not sharing the same letter represent significant differences between the groups at  $p < 0.05$ .

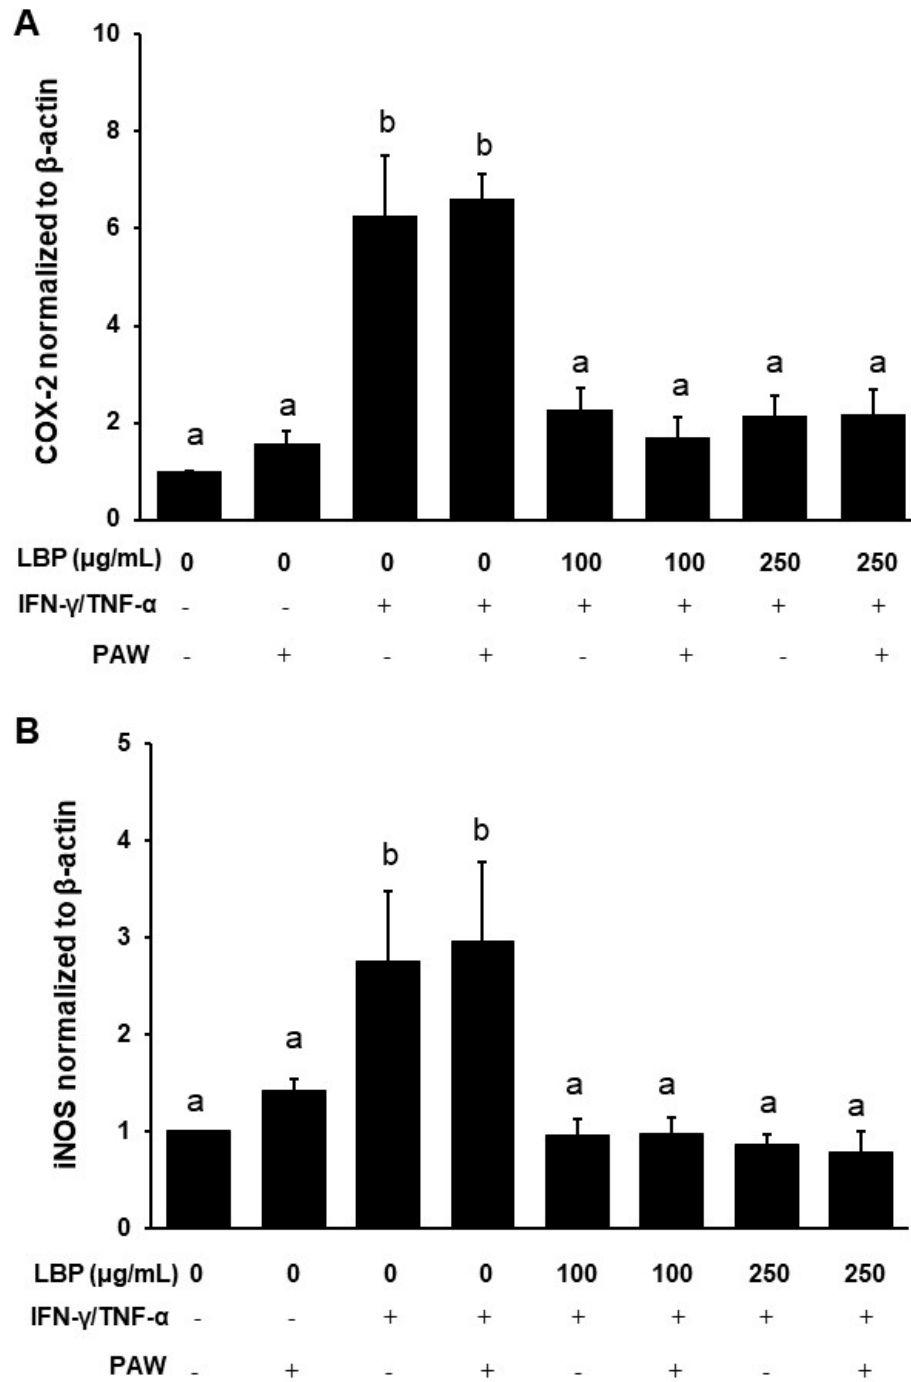

**Figure S2.** Effects of *Lycium barbarum* polysaccharides (LBP, 100-250 μg/mL) with or without plasmon-activated water (PAW) on protein expression of inflammatory markers (A) COX-2 and (B) iNOS in Caco-2 cells. Values are expressed as mean ± SEM (n = 5 per group). The data not sharing the same letter represent significant differences between the groups at  $p < 0.05$ .

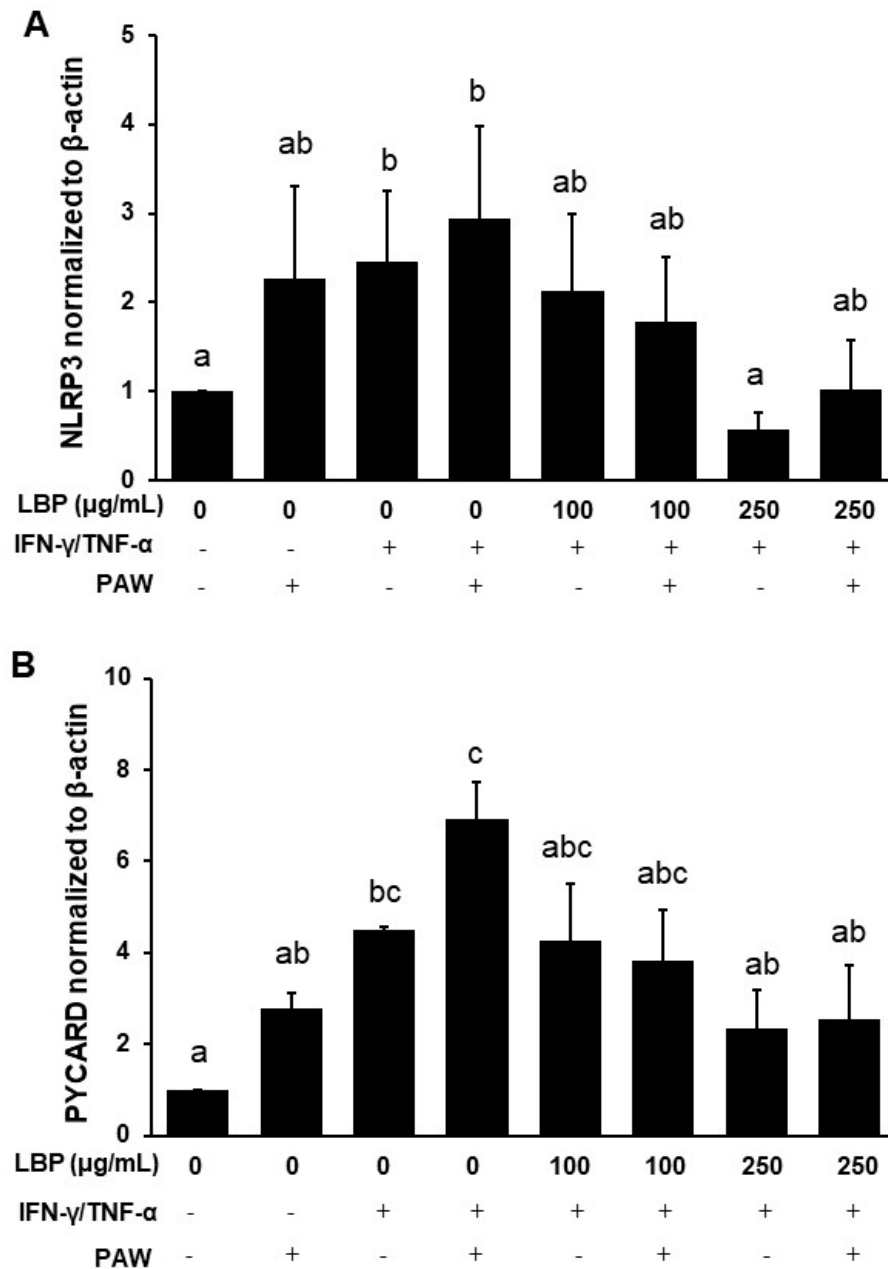

**Figure S3.** Effects of *Lycium barbarum* polysaccharides (LBP, 100-250  $\mu$ g/mL) with or without plasmon-activated water (PAW) on protein expression of (A) NLRP3 inflammasomes and (B) PYCARD in Caco-2 cells. Values are expressed as mean  $\pm$  SEM ( $n = 5$  per group). The data not sharing the same letter represent significant differences between the groups at  $p < 0.05$ .

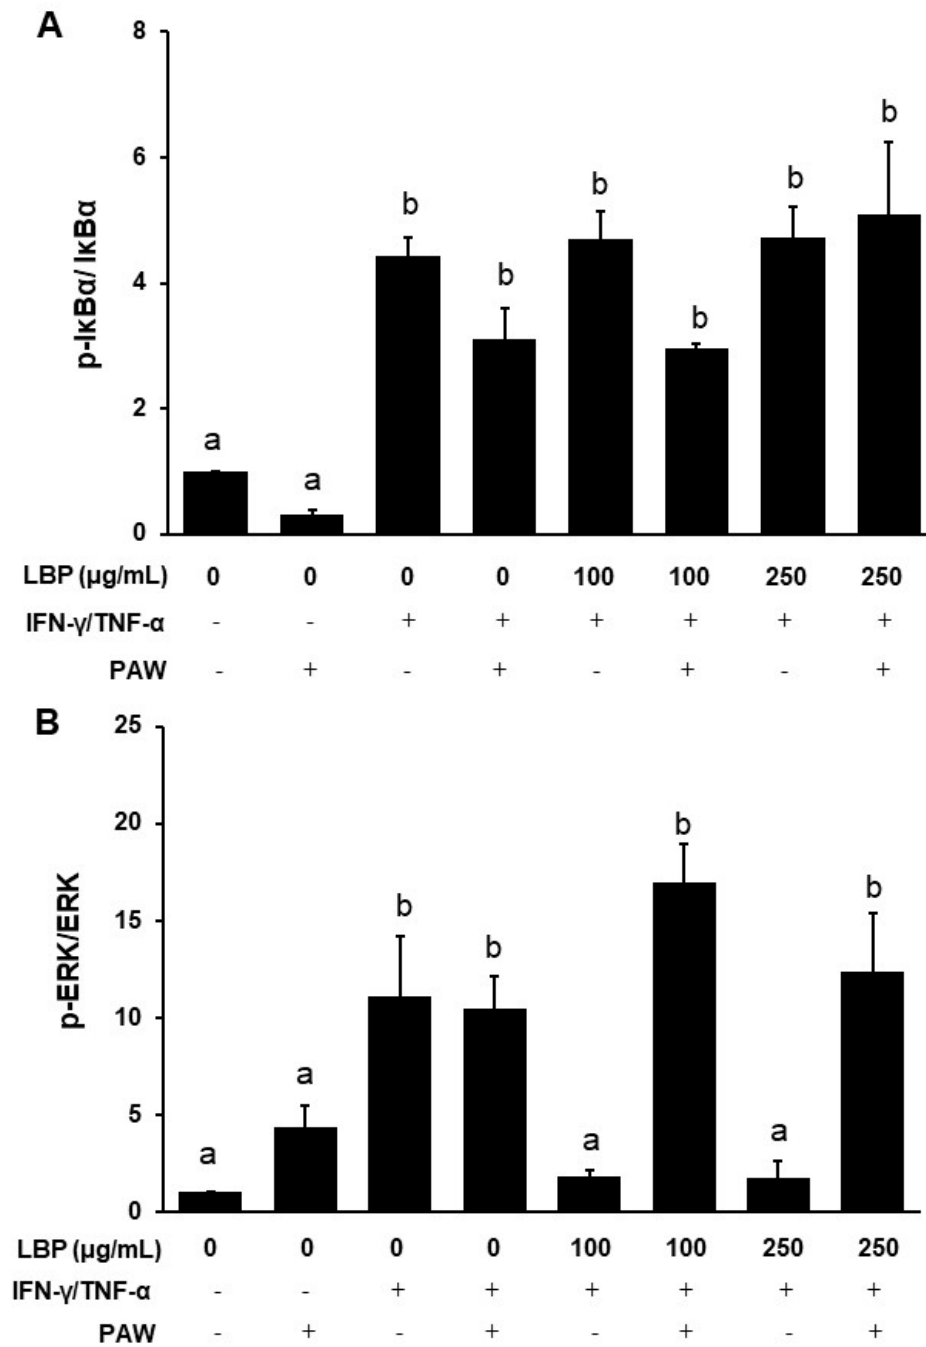

**Figure S4.** Effects of *Lycium barbarum* polysaccharides (LBP, 100-250 μg/mL) with or without plasmon-activated water (PAW) on (A) the ratio of phosphorylated IκBα to total IκBα (p-IκBα/IκBα) and (B) the ratio of phosphorylated ERK to total ERK (p-ERK/ERK) protein expression in Caco-2 cells. Values are expressed as mean ± SEM (n = 5 per group). The data not sharing the same letter represent significant differences between the groups at  $p < 0.05$ .

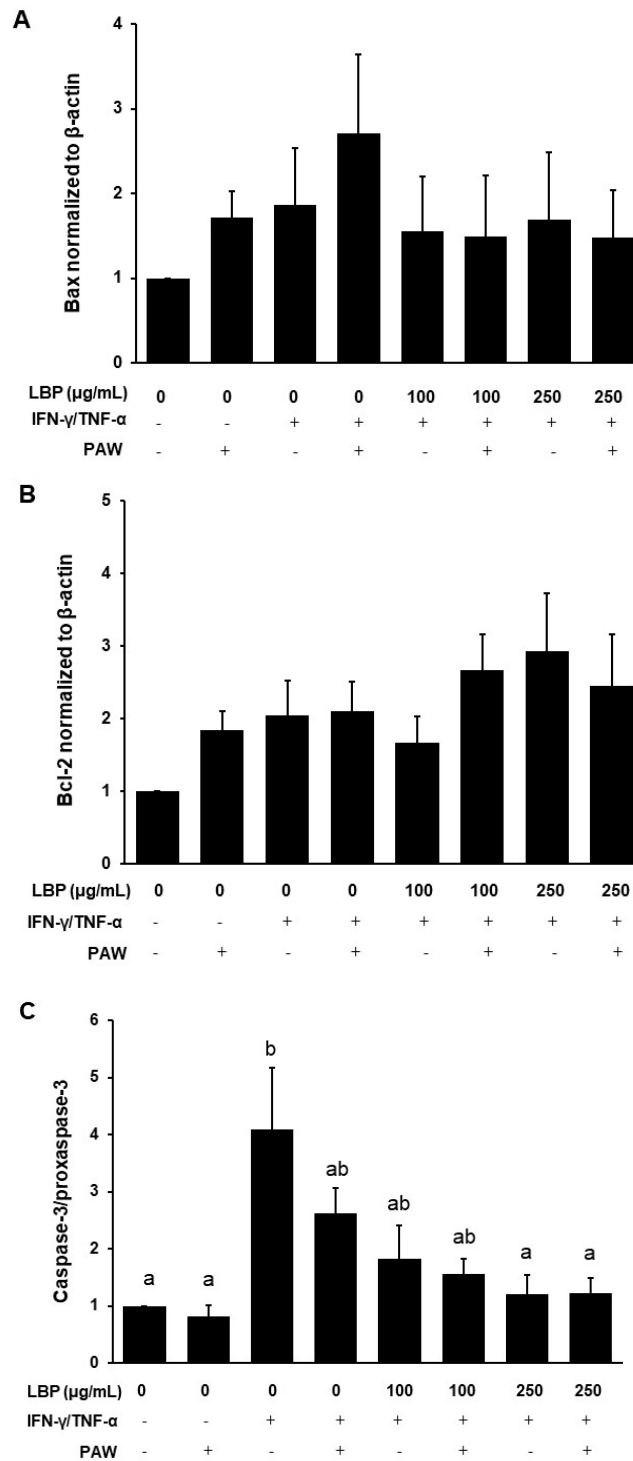

**Figure S5.** Effects of *Lycium barbarum* polysaccharides (LBP, 100-250  $\mu$ g/mL) with or without plasmon-activated water (PAW) on protein expression of apoptotic markers (A) Bax, (B) Bcl-2, and (C) caspase-3/procaspase-3 in Caco-2 cells. Values are expressed as mean  $\pm$  SEM ( $n = 5$  per group). Protein expression of Bax and Bcl-2 was not significantly different among the groups ( $p > 0.05$ ). The data not sharing the same letter represent significant differences between the groups at  $p < 0.05$ .
